# Supplementary material for: Orange emissive carbon nanodots for fluorescent and colorimetric bimodal discrimination of Cu2+ and pH
Source: Royal Society of Chemistry journal article supplement (doi:10.1039/d0an02243h), 2020-12-28
Supplement: d0an02243h1.pdf [file d0an02243h1.pdf]

## Supplementary Materials for:

### Orange emissive carbon nanodots for fluorescent and colorimetric bimodal discrimination of Cu<sup>2+</sup> and pH

Lihong Shi <sup>a,\*</sup>, Yuejing Bao<sup>a</sup>, Yan Zhang<sup>a</sup>, Caihong Zhang<sup>a</sup>, Guomei Zhang<sup>a</sup>, Chuan Dong<sup>a</sup>, Shaomin Shuang<sup>a,\*</sup>

<sup>a</sup>College of Chemistry and Chemical Engineering, Shanxi University, Taiyuan 030006, PR China

\*Corresponding author. E-mail address: shilihong@sxu.edu.cn, smshuang@sxu.edu.cn

#### Materials

The citric acid, 5-aminosalicylic acid, Tris, alanine, phenylalanine, methionine, glutamic acid, arginine, lysine, tyrosine, leucine, proline, threonine, asparagine, valine, isoleucine, histidine were obtained from Shanghai Aladdin Reagent Co, Ltd. (Shanghai, China). CuCl<sub>2</sub>, CoCl<sub>2</sub>, BiCl<sub>3</sub>, CaCl<sub>2</sub>, CdCl<sub>2</sub>, HgCl<sub>2</sub>, KCl, AlCl<sub>3</sub>, BaCl<sub>2</sub>, MgCl<sub>2</sub>, MnCl<sub>2</sub>, NaCl, PbCl<sub>2</sub> and ZnCl<sub>2</sub> were purchased from Beijing Chemical Corp (Beijing, China). Distilled deionized (DDI) water was obtained from a Millipore Milli-Q-RO4 water purification system with a resistivity of 18.2 MΩ cm<sup>-1</sup> (Bedford, MA, USA). Dialysis membranes with a MWCO of 500–1000 Da were obtained from Beijing Solarbio Science & Technology Co., Ltd (Beijing, China).

#### Apparatus

The transmission electron microscopy (TEM) images were obtained on a JEOL JEM-2100 transmission electron microscope (Tokyo, Japan) at an accelerating voltage of 200 kV. Atomic force microscope (AFM) images were obtained using an AFM Bruker MultiMode 8 in the contact mode. The UV-vis absorption spectrum of O-CDs was measured by Puxi TU-1901 UV-vis absorption spectrophotometer. Fluorescent properties were measured on a Hitachi F-4500 spectrophotometer (Tokyo, Japan). The X-ray photoelectron spectroscopy (XPS) was done on an AXISULTRA DLD X-ray photoelectron spectrometer (Kratos, Tokyo, Japan) with Al K $\alpha$  radiation operating at 1486.6 eV. Spectra were processed by the Casa XPS v.2.3.12 software using a peak-fitting routine with symmetrical Gaussian–Lorentzian functions. Fourier Transform

infrared (FTIR) spectrum was recorded on Thermo Scientific Nicolet iS50 FTIR Spectrometer. Nanosecond fluorescence lifetime experiments were performed using a FLS 920 time-correlated single-photon counting (TCSPC) system under right-angle sample geometry. All fluorescence images were collected with Zeiss LSM880 confocal laser-scanning microscope.

### Fluorescence QY measurements

The relative fluorescence QY ( $\Phi$ ) of the O-CDs was calculated using the equation:  $\Phi_x = \Phi_{\text{std}} I_x A_{\text{std}} \eta_x^2 / (I_{\text{std}} A_x \eta_{\text{std}}^2)$ . The optical densities were measured using a Puxi TU-1901 UV–vis absorption spectrophotometer. In the equation,  $I_x$  and  $I_{\text{std}}$  are the fluorescence intensities of the O-CDs and the standard, respectively.  $A_x$  and  $A_{\text{std}}$  denote the optical densities (OD) of the O-CDs and the standard, respectively. Rhodamin 6G in ethanol was chosen as a standard with a QY of 0.94 at 488 nm.  $\eta_x$  and  $\eta_{\text{std}}$  denote the refractive indices of the O-CDs and the standard, respectively. The absorbances of all the samples in a 1.0 cm cuvette were kept under 0.1 at the excitation wavelength to minimize re-absorption effects.

### MTT assay

For the cell cytotoxicity test, HeLa cells were first plated on a Costar 96-well tissue-culture cluster and cultured at 37°C with 5% CO<sub>2</sub> in air for 3 h to adhere cells onto the surface. The well without cells and treatment with O-CDs was taken as a zero set. The medium was then changed with 100  $\mu$ L of fresh DMEM supplemented with 10% FBS containing O-CDs, and the cells were allowed to grow for another 24 h. At least five parallel samples were performed in each group. Cells without treatment with N-CDs were taken as a control. After adding 20  $\mu$ L of 5.0 mg/mL MTT reagent into individual well, the cells were further incubated for 4 h, followed by removing the culture medium with MTT, and then 150  $\mu$ L of DMSO was added. The resulting mixture was shaken for ca. 10 min at room temperature. The OD of the mixture was measured at 490 nm with a SunRisemicroplate reader (Tecan Austria GmbH, Grödig, Austria). The cell viability was estimated using the equation of Cell Viability (%) =  $(\text{OD}_{\text{Treated}} / \text{OD}_{\text{Control}}) \times 100\%$ , where  $\text{OD}_{\text{Control}}$  and  $\text{OD}_{\text{Treated}}$  were obtained in the absence and presence of O-CDs, respectively.

## Cell imaging

In a 5% CO<sub>2</sub> incubator, HeLa cells in the exponential phase were seeded into 15 mm glass culture dishes at an initial density of  $1 \times 10^6$  cells/mL with DMEM containing 10% FBS and incubated at 37°C. After incubation, the medium was discarded and HeLa cells were treated with mixture of O-CDs and DMEM for 2 h. The extracellular O-CDs were removed by rinsing twice with Tris-Hcl buffer solutions (pH=7.2), and then cells were incubated with 1 mL Tris-Hcl buffer (0.01 M) containing a range of concentration of Cu<sup>2+</sup>. Immediately, fluorescence images were captured on laser scanning confocal microscope (LSCM).

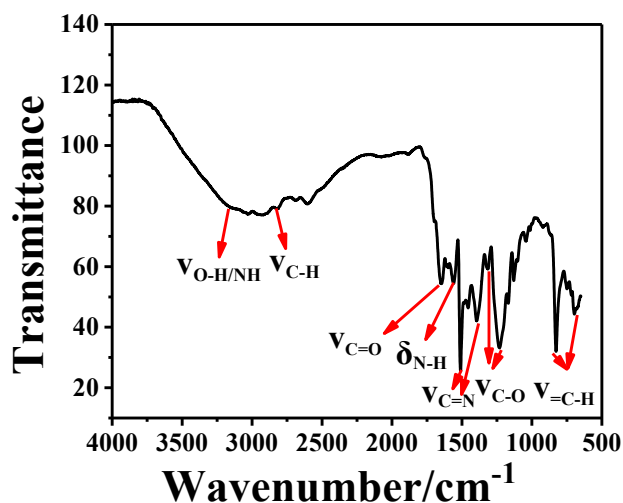

Fig. S1 FTIR spectrum of O-CDs.

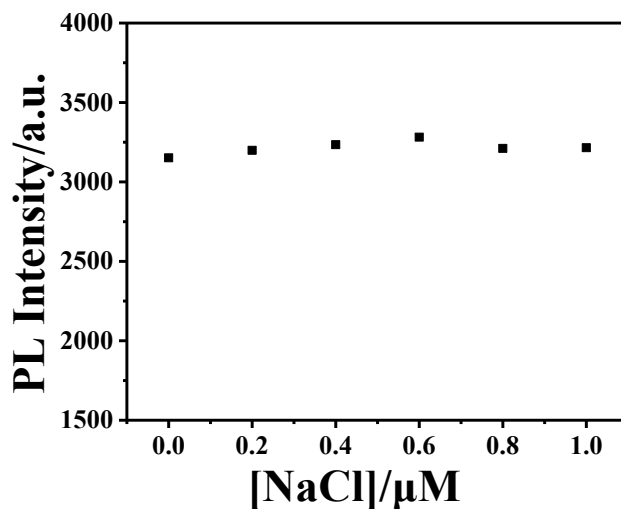

Fig. S2 Effect of NaCl concentration on fluorescence intensity of O-CDs.

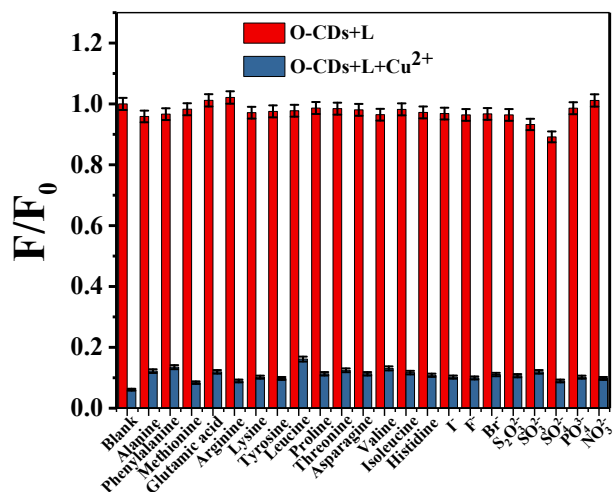

**Fig. S3** Selectivity of O-CDs for Cu<sup>2+</sup> against amino acids and anion under pH 7.2 conditions at 550 nm excitation.

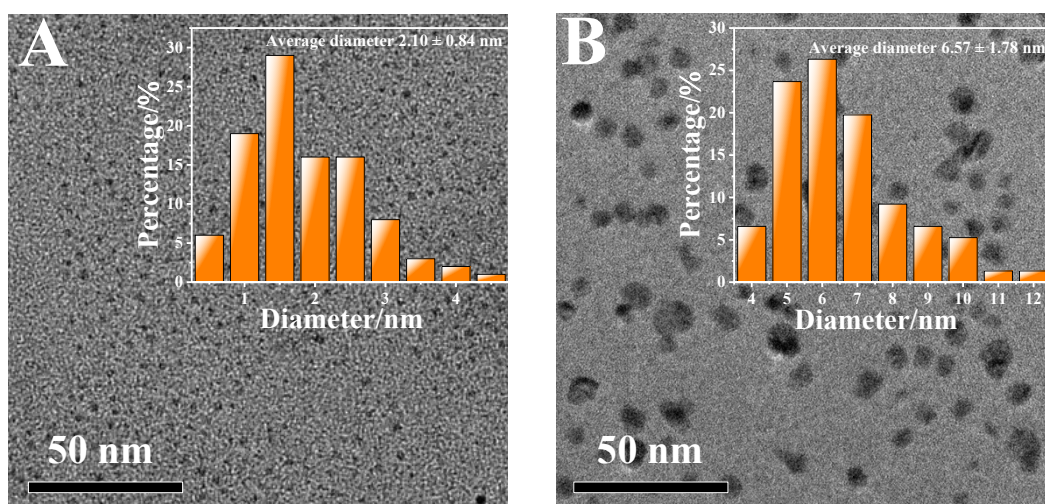

**Fig. S4** TEM images of O-CDs (A) and O-CDs/Cu<sup>2+</sup> (B).

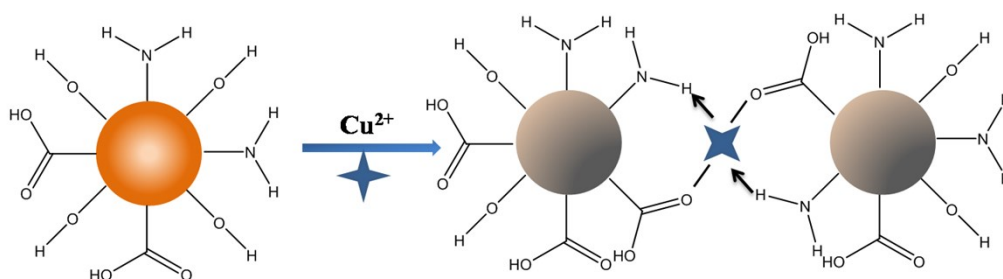

**Fig. S5** The schematic diagram of the quenching process of O-CDs coordinating with Cu<sup>2+</sup>.

Table S1 Comparison of different fluorescent CDs based probes for Cu<sup>2+</sup> detection.

| Starting material of synthesis                 | linear scope | Detection limit | Ref.      |
|------------------------------------------------|--------------|-----------------|-----------|
| citric acid and ure                            | 1–10 μM      | 40 nM           | [1]       |
| radish                                         | 1–5 μM       | 160 nM          | [2]       |
| m-phenylenediamine and sulfamide               | 2–60 μM      | 290 nM          | [3]       |
| PEI and l-cysteine                             | 0–200 μM     | 38 nM           | [4]       |
| 1-carboxyethyl-3-methyl imidazole chloride gel | 0–40 μM      | 125 nM          | [5]       |
| lemon juice and l-arginine                     | 0–300 μM     | 47 nM           | [6]       |
| citric acid and 5-aminosalicylic acid.         | 0–300 μM     | 28 nM           | This work |

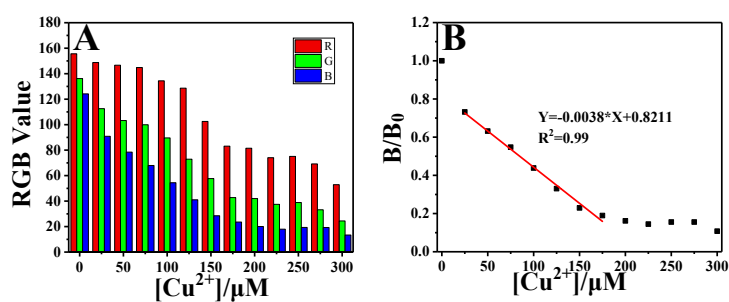

**Fig. S6** (A) RGB values versus the Cu<sup>2+</sup> concentration. (B) B/B<sub>0</sub> versus the Cu<sup>2+</sup> concentration.

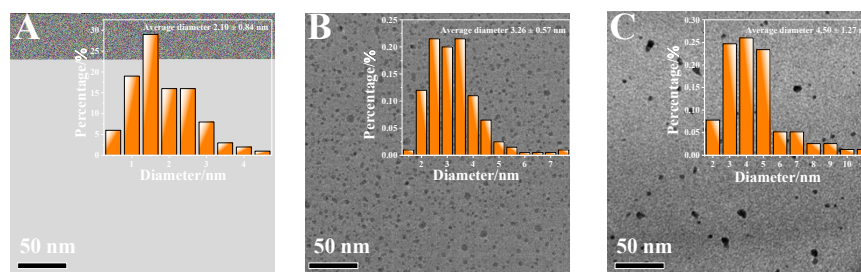

**Fig. S7** TEM images of O-CDs under different pH: (A) 7.2; (B) 8.2; (C) 9.2.

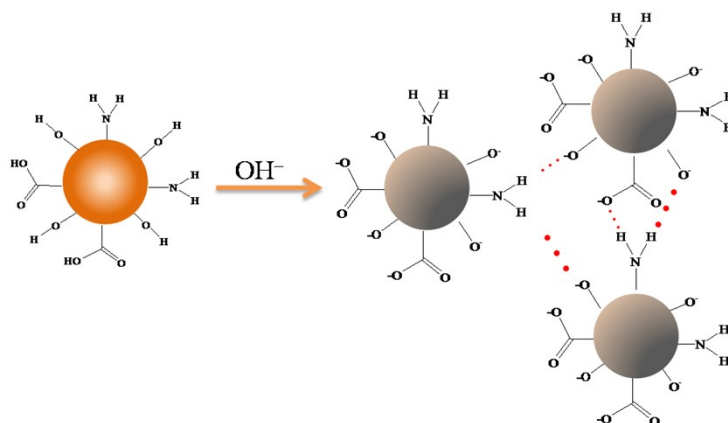

**Fig. S8** PL quenching mechanism of O-CDs under alkaline media.

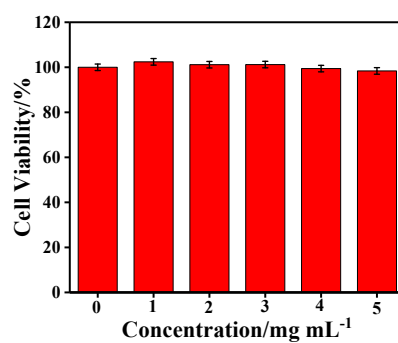

**Fig. S9** Cytotoxic effect of obtained O-CDs on HeLa cells.

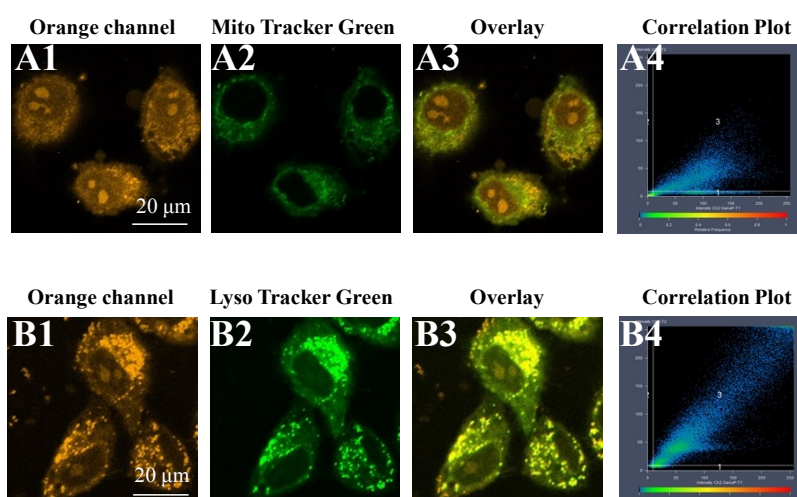

**Fig. S10** Colocalization of O-CDs in HeLa cells. (A) O-CDs and MitoTracker Green colocalization imaging. (B) O-CDs and Lyso Tracker Green colocalization imaging.

## References

- 1 C. D. Chen, M. Xu, W. W. Wu, and S. C. Li, *J. Alloys Compd*, 2017, **701**, 75–81.
- 2 J. Praneerad, N. Thongsai, P. Supchocksoonthorn, S. Kladsomboon, and P. Paoprasert, *Spectrochim. Acta A Mol. Biomol. Spectrosc*, 2018, **211**, 59–70.
- 3 Y. Y. Dai, Z. C. Liu, Y. F. Bai, Z. Z. Chen, J. Qin, and F. Feng, *RSC Adv.*, 2018, **8**, 42246–42252.
- 4 S. S. Wei, T. H. Li, X. Y. Zhang, H. Y. Zhang, C. H. Jiang, and G. Y. Sun, *Anal. Methods*, 2020, **12**, 5110–5119.
- 5 B. G. Wang, H. Tan, T. L. Zhang, W. M. Duan, and Y. Q. Zhu, *Analyst*, 2019, **144**, 3013–3022.
